# Supplementary material for: Interconvertible Lac Repressor–DNA Loops Revealed by Single-Molecule Experiments
Source: PLoS Biol. 2008 Sep 30;6(9):e232. doi: 10.1371/journal.pbio.0060232 (PMC2553838; doi:10.1371/journal.pbio.0060232)
Supplement: Table S1 — (37 KB DOC) [file pbio.0060232.st001.doc]

**Table S1:** Kinetic parameters of raw lifetime distributions and missed event corrections

|  | τ (s)  *or*  τ1 (s), τ2 (s), *A* | *F* | *d* (s) | *D* (×103 s) |
| --- | --- | --- | --- | --- |
| **O-153-O** |  |  |  |  |
| looped | 75  3 | 0.12 | 75 ± 7 | 9 ± 1 |
| unlooped | 16  2  193  19  0.38  0.02 | 0.21 | 125 ± 17 | 17 ± 3 |
| **O-158-O** |  |  |  |  |
| long-tether loop | 100  3 | 0.10 | 100 ± 6 | 27 ± 2 |
| short-tether loop | 33.6  0.3 | 0.25 | 33 ± 4 | 3.6 ± 0.5 |
| unlooped | 27  1  97  21  0.81  0.05 | 0.27 | 40 ± 5 | 9 ± 1 |
